# Supplementary material for: In situ loading of well-dispersed gold nanoparticles on two-dimensional graphene oxide/SiO2 composite nanosheets and their catalytic properties
Source: Royal Society of Chemistry journal article supplement (doi:10.1039/c2nr11625a), 2012-01-01
Supplement: c2nr11625a.pdf [file c2nr11625a.pdf]

## Electronic Supplementary Information (ESI)

### In situ loading of well-dispersed gold nanoparticles on two-dimensional graphene oxide/SiO<sub>2</sub> composite nanosheets and their catalytic properties

Chengzhou Zhu, Lei Han, Peng Hu and Shaojun Dong\*

State Key Laboratory of Electroanalytical Chemistry, Changchun Institute of Applied Chemistry, Chinese Academy of Sciences, Changchun 130022, China

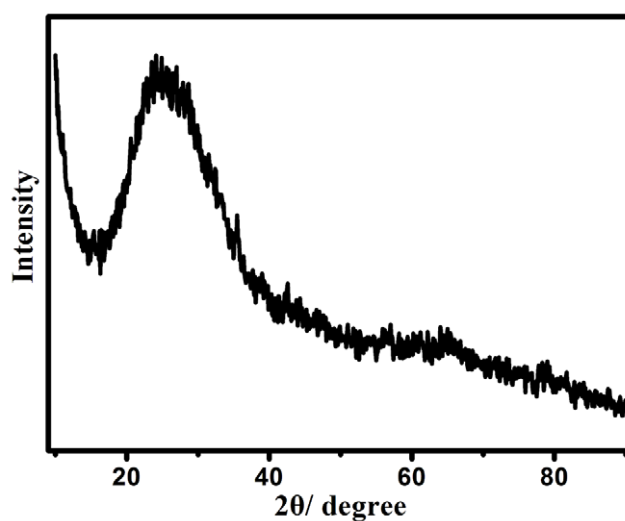

Fig. S1 XRD patterns of the obtained GSCN/Au hybrid nanomaterials.
